# Supplementary material
Source: Springer Nature journal article supplement (http://www.nature.com/nature/journal/v415/n6871/extref/415530a-s9.xls)
Supplement: 415530a-s9.xls [file 415530a-s9.xls]

## Sheet: TableS2_231prognosis_reporters.
accession #	correlation	gene name	description	sp_xref_keyword_list
NM_003748	0.420671	ALDH4	aldehyde dehydrogenase 4 (glutamate gamma-semialdehyde dehydrogenase; pyrroline-5-carboxylate dehydrogenase)	Disease mutation,Mitochondrion,NAD,Oxidoreductase,Polymorphism,Proline metabolism,Transit peptide
NM_003862	0.410964	FGF18	fibroblast growth factor 18	Glycoprotein,Growth factor,Signal
Contig32125_RC	0.409054		ESTs
U82987	0.407002	BBC3	Bcl-2 binding component 3
AB037863	0.402335	KIAA1442	KIAA1442 protein
NM_020974	0.399987	CEGP1	CEGP1 protein
Contig55377_RC	0.3906		ESTs
NM_003882	0.384479	WISP1	WNT1 inducible signaling pathway protein 1
NM_000849	0.380831	GSTM3	glutathione S-transferase M3 (brain)	Multigene family,Transferase
Contig48328_RC	0.375252		ESTs, Weakly similar to T17248 hypothetical protein DKFZp586G1122.1 [H.sapiens]
Contig46223_RC	0.374289		ESTs
NM_006117	0.37329	PECI	peroxisomal D3,D2-enoyl-CoA isomerase	Isomerase,Peroxisome
NM_003239	0.371524	TGFB3	transforming growth factor, beta 3	3D-structure,Glycoprotein,Growth factor,Mitogen,Signal
NM_018401	0.368349	HSA250839	gene for serine/threonine protein kinase
AF257175	0.3659		Homo sapiens hepatocellular carcinoma-associated antigen 64 (HCA64) mRNA, complete cds
AF201951	0.363953	CFFM4	high affinity immunoglobulin epsilon receptor beta subunit
NM_001282	0.363326	AP2B1	adaptor-related protein complex 2, beta 1 subunit	Coated pits
Contig63102_RC	0.359255	FLJ11354	hypothetical protein FLJ11354
NM_000286	0.355105	PEX12	peroxisomal biogenesis factor 12	Peroxisome,Transmembrane
Contig34634_RC	0.350892	GCN1L1	GCN1 (general control of amino-acid synthesis 1, yeast)-like 1
NM_000320	0.350505	QDPR	quinoid dihydropteridine reductase	3D-structure,Disease mutation,NADP,Oxidoreductase,Phenylketonuria,Tetrahydrobiopterin biosynthesis
AB033007	0.35035	KIAA1181	KIAA1181 protein
AL355708	0.349459		Homo sapiens mRNA full length insert cDNA clone EUROIMAGE 44260
NM_000017	0.348527	ACADS	acyl-Coenzyme A dehydrogenase, C-2 to C-3 short chain	Disease mutation,FAD,Fatty acid metabolism,Flavoprotein,Mitochondrion,Oxidoreductase,Polymorphism,Transit peptide
NM_006763	0.345013	BTG2	BTG family, member 2	Signal
AF148505	0.344597	MMSDH	methylmalonate-semialdehyde dehydrogenase	Disease mutation,Mitochondrion,NAD,Oxidoreductase,Transit peptide
Contig57595	0.343518		ESTs
NM_001280	0.34211	CIRBP	cold inducible RNA-binding protein	Nuclear protein,RNA-binding
AJ224741	0.337959	MATN3	matrilin 3	EGF-like domain,Glycoprotein,Signal
U45975	0.336027	PIB5PA	phosphatidylinositol (4,5) bisphosphate 5-phosphatase, A
Contig49670_RC	0.335911		Homo sapiens cDNA: FLJ23228 fis, clone CAE06654
Contig753_RC	0.335828		ESTs
Contig25055_RC	0.333901		ESTs, Weakly similar to DWHUT L-serine dehydratase [H.sapiens]
Contig53646_RC	0.333838		ESTs
Contig42421_RC	0.332726		ESTs, Weakly similar to unnamed protein product [H.sapiens]
Contig51749_RC	0.332572	RAI2	retinoic acid induced 2
AL137514	0.33157		Homo sapiens mRNA; cDNA DKFZp564L0678 (from clone DKFZp564L0678)	Hypothetical protein
NM_004911	0.330593	ERP70	protein disulfide isomerase related protein (calcium-binding protein, intestinal-related)	Endoplasmic reticulum,Isomerase,Redox-active center,Repeat,Signal
NM_000224	0.329843	KRT18	keratin 18	Acetylation,Coiled coil,Disease mutation,Glycoprotein,Intermediate filament,Keratin
NM_013262	0.327746	MIR	myosin regulatory light chain interacting protein
Contig41887_RC	0.327671		ESTs, Weakly similar to Homolog of rat Zymogen granule membrane protein [H.sapiens]
NM_004163	0.327549	RAB27B	RAB27B, member RAS oncogene family	GTP-binding,Lipoprotein,Prenylation
AB020689	0.327146	KIAA0882	KIAA0882 protein	Calcium-binding
NM_015416	0.326658	DKFZP586A011	DKFZP586A011 protein
Contig43747_RC	0.326592		ESTs
NM_012429	0.325185	SEC14L2	SEC14 (S. cerevisiae)-like 2	Hypothetical protein
AB033043	0.322738	DKFZP761L0424	hypothetical protein DKFZp761L0424
AL133619	0.322487		Homo sapiens mRNA; cDNA DKFZp434E2321 (from clone DKFZp434E2321); partial cds	Hypothetical protein
NM_016569	0.321978	TBX3-iso	TBX3-iso protein
NM_004480	0.318701	FUT8	fucosyltransferase 8 (alpha (1,6) fucosyltransferase)	Glycosyltransferase,Transferase
NM_004798	0.318314	KIF3B	kinesin family member 3B	ATP-binding,Coiled coil,Microtubules,Motor protein,Neurone
Contig37063_RC	0.316439		ESTs
NM_000507	0.316439	FBP1	fructose-1,6-bisphosphatase 1	3D-structure,Allosteric enzyme,Carbohydrate metabolism,Disease mutation,Gluconeogenesis,Hydrolase,Polymorphism,Zinc
AB037745	0.316433	KIAA1324	KIAA1324 protein
Contig50802_RC	0.314566		ESTs
NM_001007	0.314244	RPS4X	ribosomal protein S4, X-linked	Ribosomal protein
Contig53742_RC	0.312734		ESTs
NM_018104	0.31192	FLJ10474	hypothetical protein FLJ10474
Contig51963	0.311766	MGC2827	hypothetical protein MGC2827
Contig53268_RC	0.309868	FLJ12150	hypothetical protein FLJ12150
NM_012261	0.309834	HS1119D91	similar to S68401 (cattle) glucose induced gene
NM_020244	0.309523	LOC56994	cholinephosphotransferase 1
Contig55813_RC	0.308283		ESTs, Moderately similar to hypothetical protein [H.sapiens]
Contig27312_RC	0.307881		ESTs
Contig44064_RC	0.307246		ESTs
NM_002570	0.307121	PACE4	paired basic amino acid cleaving system 4	Alternative splicing,Calcium,Cleavage on pair of basic residues,Glycoprotein,Hydrolase,Repeat,Serine protease,Signal,Zymogen
NM_002900	0.306855	RBP3	retinol-binding protein 3, interstitial	Glycoprotein,Repeat,Signal,Transport,Vitamin A
AL050090	0.306113	DKFZP586F1018	DKFZP586F1018 protein	Hypothetical protein
NM_015417	0.305725	DKFZP434I114	DKFZP434I114 protein
Contig47405_RC	0.304337		ESTs
NM_016337	0.303423	RNB6	RNB6
Contig55829_RC	0.303133		ESTs, Weakly similar to cDNA EST EMBL:D75782 comes from this gene [C.elegans]
Contig37598	0.302795	MMSDH	methylmalonate-semialdehyde dehydrogenase	Disease mutation,Mitochondrion,NAD,Oxidoreductase,Transit peptide
Contig45347_RC	0.300785	KIAA1683	KIAA1683 protein
NM_020675	-0.300019	AD024	AD024 protein
NM_003234	-0.300316	TFRC	transferrin receptor (p90, CD71)	Endocytosis,Glycoprotein,Lipoprotein,Palmitate,Phosphorylation,Receptor,Signal-anchor,Transmembrane
AL080110	-0.300519		Homo sapiens mRNA; cDNA DKFZp586G1922 (from clone DKFZp586G1922)
AL137295	-0.300887		Homo sapiens mRNA; cDNA DKFZp434M2216 (from clone DKFZp434M2216)
Contig17359_RC	-0.301147		ESTs, Weakly similar to S72481 probable transposase [H.sapiens]
NM_013296	-0.301291	HSU54999	LGN protein	Phosphorylation,Repeat
NM_019013	-0.301444	FLJ10156	hypothetical protein
AF052159	-0.301473		Homo sapiens clone 24416 mRNA sequence
Contig55313_RC	-0.302308		ESTs
NM_002358	-0.30251	MAD2L1	MAD2 (mitotic arrest deficient, yeast, homolog)-like 1	3D-structure,Cell cycle,Mitosis,Nuclear protein
NM_004358	-0.303113	CDC25B	cell division cycle 25B	3D-structure,Cell division,Hydrolase,Mitosis,Multigene family
Contig50106_RC	-0.304123		Homo sapiens mRNA for KIAA1708 protein, partial cds
NM_005342	-0.30429	HMG4	high-mobility group (nonhistone chromosomal) protein 4
NM_014754	-0.306887	PTDSS1	phosphatidylserine synthase 1	Phospholipid biosynthesis,Transferase,Transmembrane
U58033	-0.306994	MTMR2	myotubularin related protein 2	Charcot-Marie-Tooth disease,Hydrolase
Contig64688	-0.307043	FLJ23468	hypothetical protein FLJ23468
NM_001827	-0.308101	CKS2	CDC28 protein kinase 2	3D-structure,Cell division,Multigene family
Contig3902_RC	-0.308255		Human DNA sequence from clone RP5-858B6 on chromosome 1q42.13-43 Contains ESTs, STSs, GSSs and a CpG island. Contains three novel genes
Contig41413_RC	-0.308372	RRM2	ribonucleotide reductase M2 polypeptide	DNA replication,Iron,Oxidoreductase
NM_015434	-0.308773	DKFZP434B168	DKFZP434B168 protein
NM_014078	-0.308816	L13	L13 protein	Ribosomal protein
NM_018120	-0.309766	FLJ10511	hypothetical protein FLJ10511
NM_001124	-0.309959	ADM	adrenomedullin	Amidation,Cleavage on pair of basic residues,Hormone,Signal
L27560	-0.312261		Human insulin-like growth factor binding protein 5 (IGFBP5) mRNA
Contig45816_RC	-0.312313		ESTs
AL050021	-0.312792		Homo sapiens mRNA; cDNA DKFZp564D016 (from clone DKFZp564D016)
NM_006115	-0.312978	PRAME	preferentially expressed antigen in melanoma	Antigen
NM_001333	-0.3143	CTSL2	cathepsin L2	3D-structure,Glycoprotein,Hydrolase,Lysosome,Signal,Thiol protease,Zymogen
NM_005496	-0.314665	SMC4L1	SMC4 (structural maintenance of chromosomes 4, yeast)-like 1	Hypothetical protein
Contig51519_RC	-0.315998		ESTs
Contig1778_RC	-0.316409		ESTs
NM_014363	-0.316504	SACS	spastic ataxia of Charlevoix-Saguenay (sacsin)	Chaperone,Polymorphism
NM_001905	-0.316985	CTPS	CTP synthase	Glutamine amidotransferase,Ligase,Pyrimidine biosynthesis
NM_018454	-0.317076	BM037	uncharacterized bone marrow protein BM037
NM_002811	-0.317445	PSMD7	proteasome (prosome, macropain) 26S subunit, non-ATPase, 7 (Mov34 homolog)	Proteasome
NM_004603	-0.317755	STX1A	syntaxin 1A (brain)	Antigen,Coiled coil,Neurotransmitter transport,Transmembrane
AB032973	-0.318432	LCHN	LCHN protein
NM_006096	-0.318612	NDRG1	N-myc downstream regulated	Nuclear protein,Repeat
D25328	-0.318951	PFKP	phosphofructokinase, platelet	Allosteric enzyme,Glycolysis,Kinase,Magnesium,Multigene family,Phosphorylation,Repeat,Transferase
Contig46802_RC	-0.319329		Homo sapiens scavenger receptor cysteine-rich type 1 protein M160 precursor, mRNA, complete cds, alternatively spliced
X94232	-0.319413	MAPRE2	microtubule-associated protein, RP/EB family, member 2
NM_018004	-0.320034	FLJ10134	hypothetical protein FLJ10134
Contig8581_RC	-0.320433		ESTs
Contig55188_RC	-0.320483	FLJ22341	hypothetical protein FLJ22341
Contig50410	-0.32152		Homo sapiens mRNA; cDNA DKFZp586J0720 (from clone DKFZp586J0720)
Contig53226_RC	-0.321716		ESTs
NM_012214	-0.321864	MGAT4A	mannosyl (alpha-1,3-)-glycoprotein beta-1,4-N-acetylglucosaminyltransferase, isoenzyme A
NM_006201	-0.322398	PCTK1	PCTAIRE protein kinase 1	ATP-binding,Serine/threonine-protein kinase,Transferase
NM_006372	-0.322482	NSAP1	NS1-associated protein 1
Contig13480_RC	-0.322679		ESTs
AL137502	-0.323276	DKFZP761H171	hypothetical GTP-binding protein DKFZp761H171	Hypothetical protein
Contig40128_RC	-0.323586		ESTs
NM_003676	-0.323889	DEGS	degenerative spermatocyte (homolog Drosophila; lipid desaturase)
NM_013437	-0.32456	ST7	potential tumor suppressor
Contig2504_RC	-0.324997		ESTs
AL133603	-0.325006		Homo sapiens mRNA; cDNA DKFZp434E1515 (from clone DKFZp434E1515)
NM_012177	-0.325709	FBXO5	F-box only protein 5
R70506_RC	-0.325832		Homo sapiens sprouty-4C mRNA, complete cds
NM_003662	-0.326725	PIR	Pirin
NM_018136	-0.327067	FLJ10549	hypothetical protein FLJ10549
NM_000158	-0.327818	GBE1	glucan (1,4-alpha-), branching enzyme 1 (glycogen branching enzyme, Andersen disease, glycogen storage disease type IV)	Glycogen biosynthesis,Glycogen storage disease,Glycosyltransferase,Transferase
NM_018410	-0.327831	DKFZp762E1312	hypothetical protein DKFZp762E1312	Hypothetical protein
Contig21812_RC	-0.32832	FLJ21924	hypothetical protein FLJ21924
NM_004052	-0.329067	BNIP3	BCL2/adenovirus E1B 19kD-interacting protein 3	Apoptosis,Mitochondrion,Transmembrane
Contig4595	-0.329257		ESTs, Weakly similar to weak similarity to collagens [C.elegans]
Contig60864_RC	-0.329699		ESTs
NM_003878	-0.330329	GGH	gamma-glutamyl hydrolase (conjugase, folylpolygammaglutamyl hydrolase)	Glycoprotein,Hydrolase,Lysosome,Signal
U96131	-0.330572	TRIP13	thyroid hormone receptor interactor 13
NM_005563	-0.330573	LAP18	leukemia-associated phosphoprotein p18 (stathmin)	Acetylation,Coiled coil,Phosphorylation
NM_018455	-0.331027	BM039	uncharacterized bone marrow protein BM039
Contig44799_RC	-0.331595		ESTs
NM_003258	-0.332658	TK1	thymidine kinase 1, soluble	ATP-binding,DNA synthesis,Kinase,Transferase
NM_004456	-0.332666	EZH2	enhancer of zeste (Drosophila) homolog 2	DNA-binding,Nuclear protein,Transcription regulation
NM_003158	-0.332698	STK6	serine/threonine kinase 6	ATP-binding,Serine/threonine-protein kinase,Transferase
NM_014750	-0.332765	KIAA0008	KIAA0008 gene product	Hypothetical protein
Contig25343_RC	-0.33287		ESTs
NM_005196	-0.333427	CENPF	centromere protein F (350/400kD, mitosin)	Antigen,Cell cycle,Centromere,Chromosomal protein,Coiled coil,Mitosis,Nuclear protein,Phosphorylation
Contig57864_RC	-0.333585		ESTs
NM_014109	-0.333637	PRO2000	PRO2000 protein
NM_002808	-0.334053	PSMD2	proteasome (prosome, macropain) 26S subunit, non-ATPase, 2	Proteasome,Transmembrane
Contig58368_RC	-0.334201	LOC56901	NADH:ubiquinone oxidoreductase MLRQ subunit homolog	Ubiquinone
Contig46653_RC	-0.335042		ESTs
NM_004504	-0.335652	HRB	HIV-1 Rev binding protein	DNA-binding,Nuclear protein,Repeat,Transport
M21551	-0.336781	NMB	neuromedin B	Amidation,Bombesin family,Cleavage on pair of basic residues,Signal
NM_014875	-0.337104	KIAA0042	KIAA0042 gene product	ATP-binding,Coiled coil,Microtubules,Motor protein
NM_001168	-0.338128	BIRC5	baculoviral IAP repeat-containing 5 (survivin)	Nuclear protein,Protease
NM_003376	-0.338866	VEGF	vascular endothelial growth factor	3D-structure,Alternative splicing,Glycoprotein,Growth factor,Mitogen,Signal
NM_018098	-0.339792	FLJ10461	hypothetical protein FLJ10461
AF161553	-0.341001	NS1-BP	NS1-binding protein
NM_020166	-0.342723	MCCC1	methylcrotonoyl-Coenzyme A carboxylase 1 (alpha)
NM_017779	-0.342905	FLJ20354	hypothetical protein FLJ20354
NM_018265	-0.344069	FLJ10901	hypothetical protein FLJ10901
AF155117	-0.344538		Homo sapiens NY-REN-62 antigen mRNA, partial cds	ATP-binding,Coiled coil,Microtubules,Motor protein
NM_004701	-0.346075	CCNB2	cyclin B2	Cell cycle,Cell division,Cyclin,Mitosis
NM_006281	-0.347976	STK3	serine/threonine kinase 3 (Ste20, yeast homolog)	ATP-binding,Serine/threonine-protein kinase,Transferase
Contig44289_RC	-0.34813		ESTs
NM_004336	-0.34954	BUB1	budding uninhibited by benzimidazoles 1 (yeast homolog)	ATP-binding,Cell cycle,Mitosis,Nuclear protein,Phosphorylation,Polymorphism,Serine/threonine-protein kinase,Transferase
Contig33814_RC	-0.349802		ESTs
NM_003600	-0.352033	STK15	serine/threonine kinase 15	ATP-binding,Kinase,Serine/threonine-protein kinase,Transferase
NM_006265	-0.352035	RAD21	RAD21 (S. pombe) homolog	Calcium-binding,DNA damage,DNA repair,Nuclear protein,Phosphorylation
NM_000291	-0.352119	PGK1	phosphoglycerate kinase 1	Acetylation,Disease mutation,Glycolysis,Hereditary hemolytic anemia,Kinase,Multigene family,Polymorphism,Transferase
NM_000096	-0.35245	CP	ceruloplasmin (ferroxidase)	3D-structure,Copper,Glycoprotein,Metal-binding,Oxidoreductase,Plasma,Polymorphism,Repeat,Signal
NM_001673	-0.352502	ASNS	asparagine synthetase	Asparagine biosynthesis,Glutamine amidotransferase,Ligase
NM_001216	-0.353255	CA9	carbonic anhydrase IX	Antigen,Glycoprotein,Lyase,Transmembrane,Zinc
NM_014968	-0.354256	KIAA1104	KIAA1104 protein
NM_018354	-0.356001	FLJ11190	hypothetical protein FLJ11190
NM_007036	-0.356542	ESM1	endothelial cell-specific molecule 1	Signal
NM_004702	-0.356595	CCNE2	cyclin E2	Alternative splicing,Cell cycle,Cell division,Cyclin,Nuclear protein,Phosphorylation
Contig2399_RC	-0.356602	SM-20	similar to rat smooth muscle protein SM-20
NM_001809	-0.357716	CENPA	centromere protein A (17kD)	Antigen,Centromere,Chromosomal protein,DNA-binding,Nuclear protein
Contig20217_RC	-0.357877		ESTs
NM_003981	-0.358259	PRC1	protein regulator of cytokinesis 1
NM_007203	-0.359573	AKAP2	A kinase (PRKA) anchor protein 2
NM_006681	-0.359698	NMU	neuromedin U	Amidation,Cleavage on pair of basic residues,Neuropeptide,Signal
AF055033	-0.359944	IGFBP5	insulin-like growth factor binding protein 5	3D-structure,Glycoprotein,Growth factor binding,Signal
NM_014889	-0.360044	MP1	metalloprotease 1 (pitrilysin family)	Metalloprotease,Protease
NM_020386	-0.360778	LOC57110	H-REV107 protein-related protein
NM_000599	-0.361285	IGFBP5	insulin-like growth factor binding protein 5	3D-structure,Glycoprotein,Growth factor binding,Signal
Contig56457_RC	-0.361645	TMEFF1	transmembrane protein with EGF-like and two follistatin-like domains 1	EGF-like domain,Glycoprotein,Signal,Transmembrane
NM_005915	-0.363852	MCM6	minichromosome maintenance deficient (mis5, S. pombe) 6	ATP-binding,Cell cycle,DNA replication,DNA-binding,Nuclear protein,Transcription regulation
Contig24252_RC	-0.364986		ESTs
Contig55725_RC	-0.365347		ESTs, Moderately similar to T50635 hypothetical protein DKFZp762L0311.1 [H.sapiens]
NM_002916	-0.365585	RFC4	replication factor C (activator 1) 4 (37kD)	ATP-binding,DNA replication,Nuclear protein
NM_014321	-0.365812	ORC6L	origin recognition complex, subunit 6 (yeast homolog)-like
NM_006931	-0.366486	SLC2A3	solute carrier family 2 (facilitated glucose transporter), member 3	Duplication,Glycoprotein,Multigene family,Sugar transport,Transmembrane,Transport
AL080079	-0.367388	DKFZP564D0462	hypothetical protein DKFZp564D0462
Contig51464_RC	-0.367446	FLJ22477	hypothetical protein FLJ22477
NM_000788	-0.367698	DCK	deoxycytidine kinase	ATP-binding,Kinase,Nuclear protein,Transferase
NM_016448	-0.369416	L2DTL	L2DTL protein
X05610	-0.370857	COL4A2	collagen, type IV, alpha 2	Basement membrane,Collagen,Connective tissue,Extracellular matrix,Glycoprotein,Hydroxylation,Repeat,Signal
NM_014791	-0.370858	KIAA0175	KIAA0175 gene product	ATP-binding,Serine/threonine-protein kinase,Transferase
Contig40831_RC	-0.372931		ESTs
AK000745	-0.373061		Homo sapiens cDNA FLJ20738 fis, clone HEP08257
NM_015984	-0.373876	UCH37	ubiquitin C-terminal hydrolase UCH37	Hydrolase
NM_016577	-0.376227	RAB6B	RAB6B, member RAS oncogene family
Contig32185_RC	-0.379169		Homo sapiens cDNA FLJ13997 fis, clone Y79AA1002220
AF052162	-0.380834	FLJ12443	hypothetical protein FLJ12443
AF073519	-0.38334	SERF1A	small EDRK-rich factor 1A (telomeric)
NM_003607	-0.384392	PK428	Ser-Thr protein kinase related to the myotonic dystrophy protein kinase	ATP-binding,Serine/threonine-protein kinase,Transferase
NM_006101	-0.385893	HEC	highly expressed in cancer, rich in leucine heptad repeats
NM_003875	-0.386515	GMPS	guanine monphosphate synthetase	ATP-binding,GMP biosynthesis,Glutamine amidotransferase,Ligase,Purine biosynthesis
Contig25991	-0.390367	ECT2	epithelial cell transforming sequence 2 oncogene
Contig35251_RC	-0.390407		Homo sapiens cDNA: FLJ22719 fis, clone HSI14307
NM_004994	-0.391694	MMP9	matrix metalloproteinase 9 (gelatinase B, 92kD gelatinase, 92kD type IV collagenase)	Calcium,Collagen degradation,Extracellular matrix,Glycoprotein,Hydrolase,Metalloprotease,Repeat,Signal,Zinc,Zymogen
NM_000436	-0.392119	OXCT	3-oxoacid CoA transferase	Disease mutation,Mitochondrion,Polymorphism,Transferase,Transit peptide
NM_002073	-0.395461	GNAZ	guanine nucleotide binding protein (G protein), alpha z polypeptide	ADP-ribosylation,GTP-binding,Lipoprotein,Membrane,Multigene family,Myristate,Palmitate,Transducer
NM_002019	-0.398066	FLT1	fms-related tyrosine kinase 1 (vascular endothelial growth factor/vascular permeability factor receptor)	3D-structure,ATP-binding,Glycoprotein,Immunoglobulin domain,Phosphorylation,Receptor,Signal,Transferase,Transmembrane,Tyrosine-protein kinase
NM_000127	-0.399515	EXT1	exostoses (multiple) 1	Anti-oncogene,Disease mutation,Multigene family,Signal-anchor,Transmembrane
NM_020188	-0.400072	DC13	DC13 protein
AL137718	-0.404979		Homo sapiens mRNA; cDNA DKFZp434C0931 (from clone DKFZp434C0931); partial cds	Alternative splicing,Coiled coil,Repeat
Contig28552_RC	-0.409259		Homo sapiens mRNA; cDNA DKFZp434C0931 (from clone DKFZp434C0931); partial cds	Alternative splicing,Coiled coil,Repeat
Contig38288_RC	-0.414971		ESTs, Weakly similar to ISHUSS protein disulfide-isomerase [H.sapiens]
AA555029_RC	-0.424122		ESTs
NM_016359	-0.424927	LOC51203	clone HQ0310 PRO0310p1
Contig46218_RC	-0.432539		ESTs
Contig63649_RC	-0.468129		ESTs
AL080059	-0.527145		Homo sapiens mRNA for KIAA1750 protein, partial cds
